# Supplementary material for: Mapping the Mutual Information Network of Enzymatic Families in the Protein Structure to Unveil Functional Features
Source: PubMed Central journal article supplement (PMC3405127; doi:10.1371/journal.pone.0041430), 2012-07-25

A

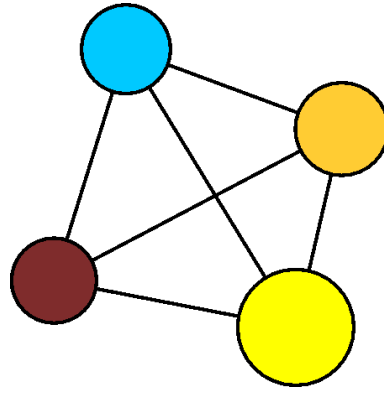

B

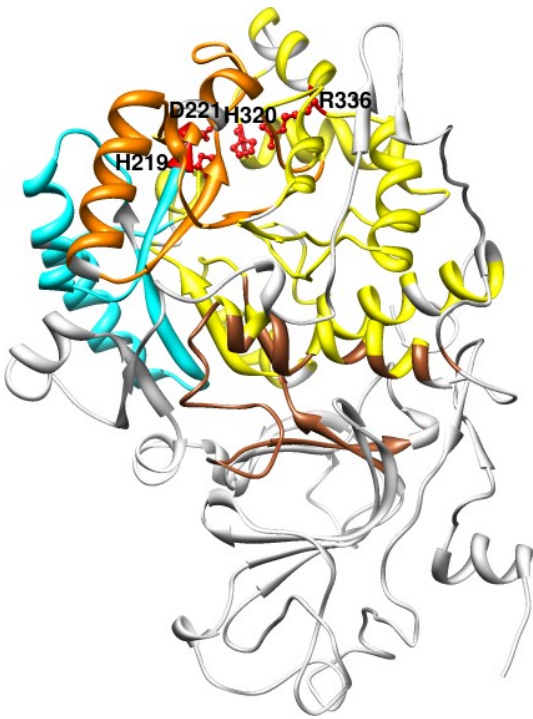

C

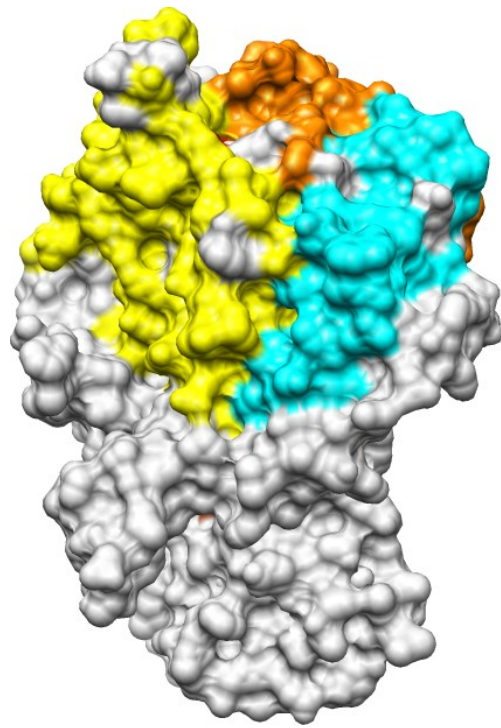

D

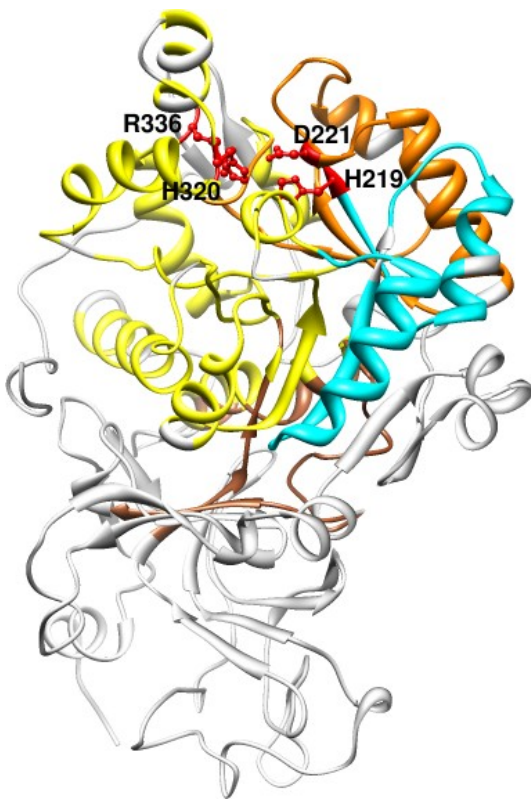

E

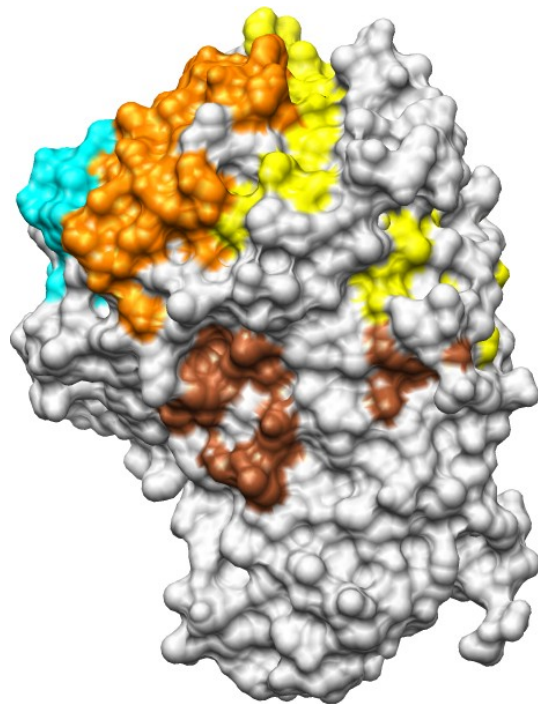

Supplement: pone.0041430.s010.pdf [file pone.0041430.s010.pdf]
