# Supplementary material for: Mapping the Mutual Information Network of Enzymatic Families in the Protein Structure to Unveil Functional Features
Source: PubMed Central journal article supplement (PMC3405127; doi:10.1371/journal.pone.0041430), 2012-07-25

**A**

Mutual information data

3D structure data

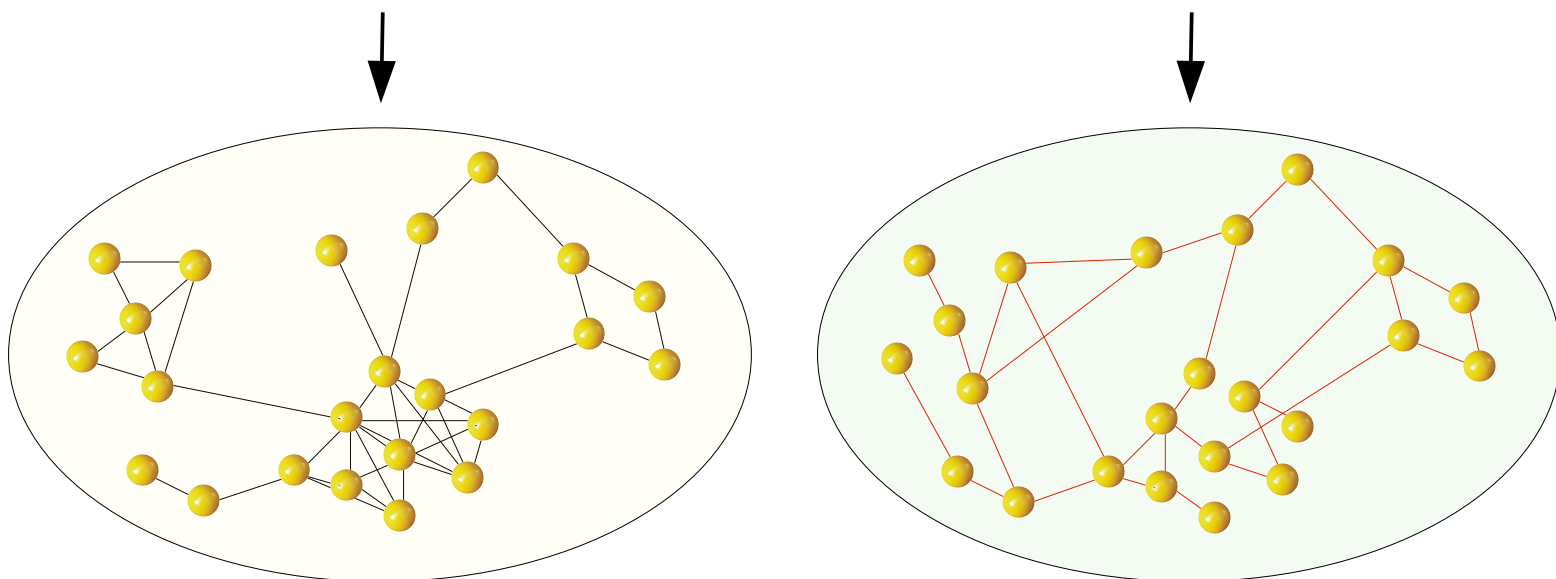**B**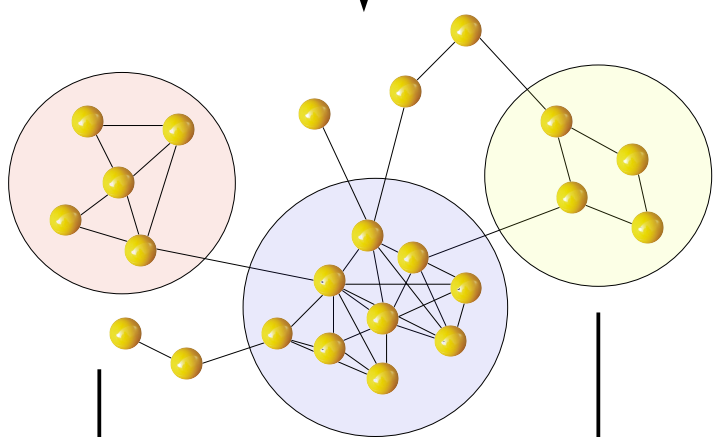**C**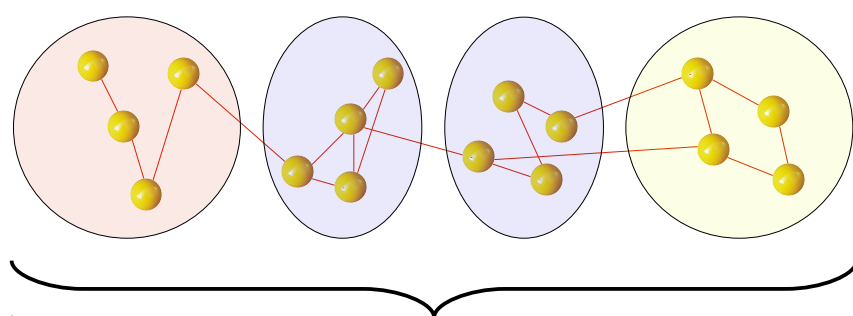**D**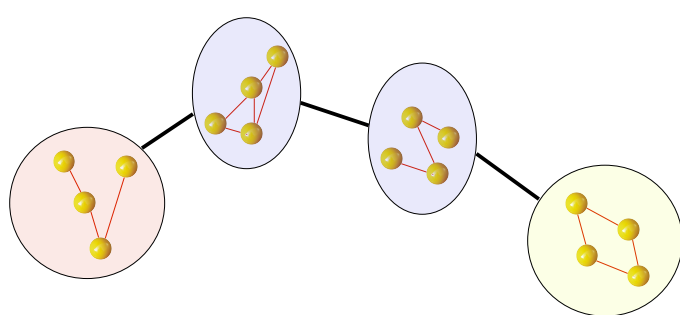

Supplement: pone.0041430.s013.pdf [file pone.0041430.s013.pdf]
