# Supplementary material for: Mapping the Mutual Information Network of Enzymatic Families in the Protein Structure to Unveil Functional Features
Source: PubMed Central journal article supplement (PMC3405127; doi:10.1371/journal.pone.0041430), 2012-07-25
Supplement: pone.0041430.s015.pdf [file pone.0041430.s015.pdf]

| Parameter                  | Definition                                                                                                                                                                                   |
|----------------------------|----------------------------------------------------------------------------------------------------------------------------------------------------------------------------------------------|
| Degree                     | Number of connections of a node (i.e. number of neighbors of a node). Local parameter.                                                                                                       |
| Clustering coefficient     | Ratio of the number of connections in the neighborhood of a node and the total number of connections if the neighborhood was fully connected. Local parameter.                               |
| Density                    | Ratio of the number of connections in the network and the total number of connections if the network was fully connected. Global parameter.                                                  |
| Characteristic path length | Number of steps of the shortest path between any two nodes averaged for all pairs of nodes in the network. Global parameter.                                                                 |
| Modularity                 | The modularity of a division of network is the fraction of the edges included in the resulting groups minus the expected such fraction if edges were randomly distributed. Global parameter. |
| Betweenness centrality     | Ratio of the number of shortest paths between any two nodes in the network that pass through a given node. Local parameter.                                                                  |
